# Supplementary material for: Determinants of Herpetofaunal Diversity in a Threatened Wetland Ecosystem: A Case Study of the Ramaroshan Wetland Complex, Western Nepal
Source: MDPI journal article supplement (doi:10.3390/ani13010135), 2022-12-29
Supplement: s1 [file s1]

# Determinants of Herpetofaunal Diversity in a Threatened Wetland Ecosystem: A Case Study of the Ramaroshan Wetland Complex, Western Nepal

Janaki Paudel <sup>1,†</sup>, Laxman Khanal <sup>1\*†</sup>, Naresh Pandey <sup>1</sup>, Laxmi Prasad Upadaya <sup>1</sup>, Chandra Bahadur Sunar <sup>1</sup>, Bina Thapa <sup>2</sup>, Chet Raj Bhatta <sup>3</sup>, Ramesh Raj Pant <sup>2</sup>, Randall C. Kyes <sup>4</sup>

## Supplementary Materials

**Supplementary Table S1.** Accuracy assessment of the classified images.

| Land cover        | 1989  |       | 2000  |       | 2010  |       | 2021  |       |
|-------------------|-------|-------|-------|-------|-------|-------|-------|-------|
|                   | UA    | PA    | UA    | PA    | UA    | PA    | UA    | PA    |
| Agricultural land | 80    | 50    | 60    | 75    | 89.97 | 62.5  | 87.33 | 62.5  |
| Barren land       | 71.42 | 71.42 | 85.71 | 75    | 85.71 | 100   | 71.42 | 100   |
| Grassland         | 66.66 | 66.66 | 83.33 | 71.42 | 66.66 | 80    | 83.33 | 83.33 |
| Vegetation        | 50    | 96.23 | 83.33 | 100   | 83.33 | 91.34 | 91    | 94    |
| Water body        | 83.33 | 83.33 | 83.33 | 83.33 | 83.33 | 83.33 | 83.33 | 92.56 |
| Overall accuracy  | 70    |       | 80    |       | 83.33 |       | 86.66 |       |
| Kappa coefficient | 0.62  |       | 0.74  |       | 0.79  |       | 0.83  |       |

Notes: UA- User Accuracy, PA- Producer's accuracy

**Supplementary Figure S1.** Photographs of herpetofauna recorded from the Ramaroshan Wetland Complex, Achham District, Nepal

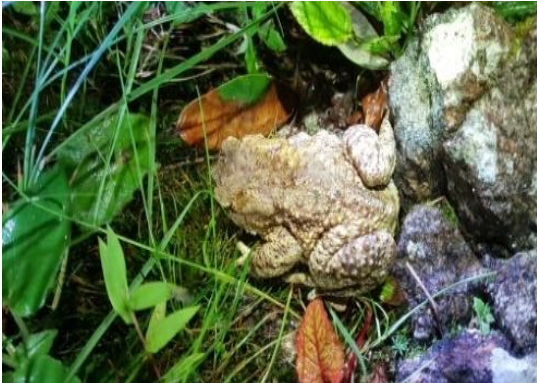

**Photo 1:** *Duttaphrynus himalayanus*

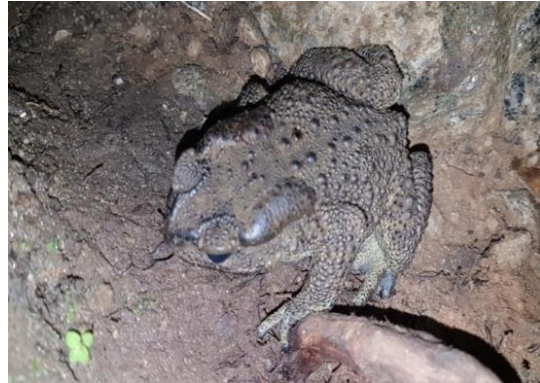

**Photo 2:** *D. melanostictus*

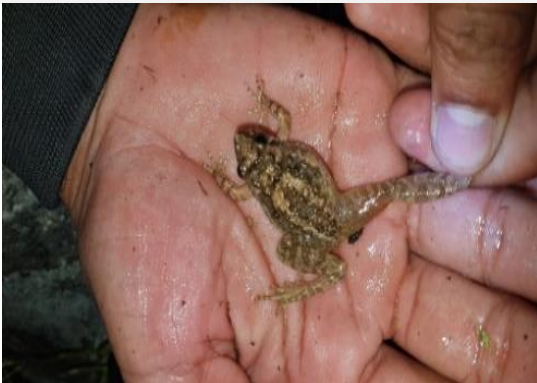

**Photo 3:** *Nanorana minica*

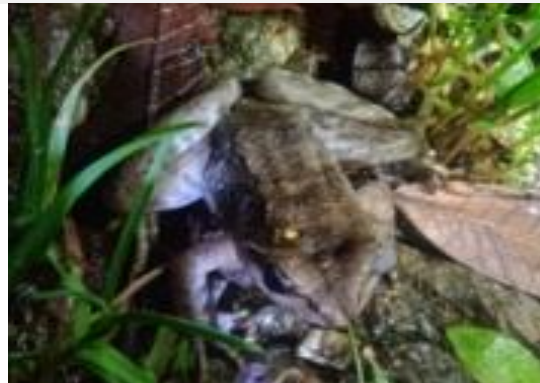

**Photo 4:** *Polunin paa*

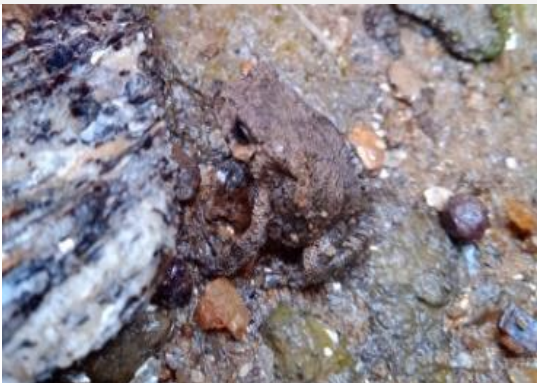

**Photo 5:** *Nanorana rostandi*

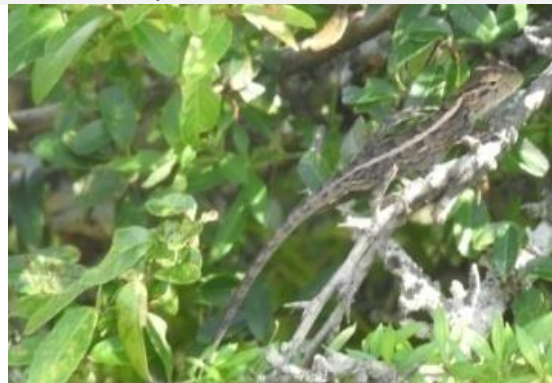

**Photo 6:** *Calotes versicolor*

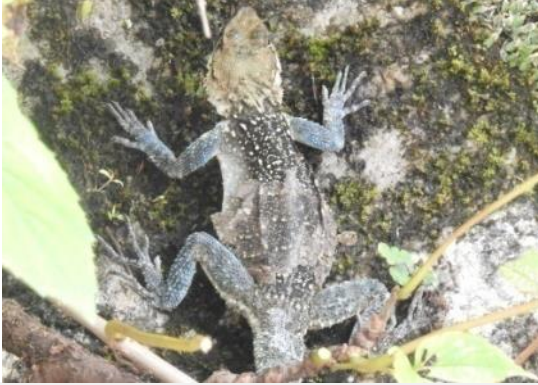

Photo 7: *Laudakia tuberculata*

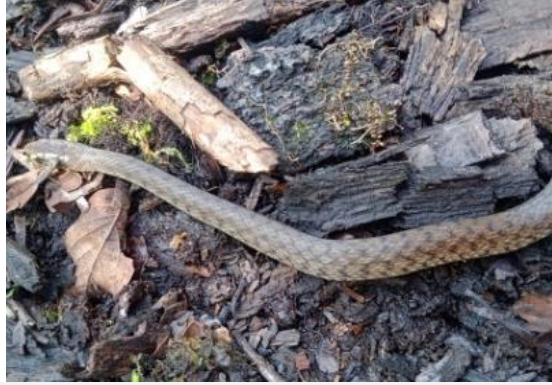

Photo 8: *Elaphe hodgsonii*

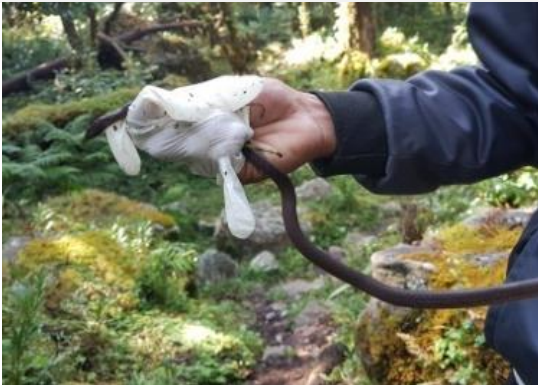

Photo 9: *Amphiesma platyceps*

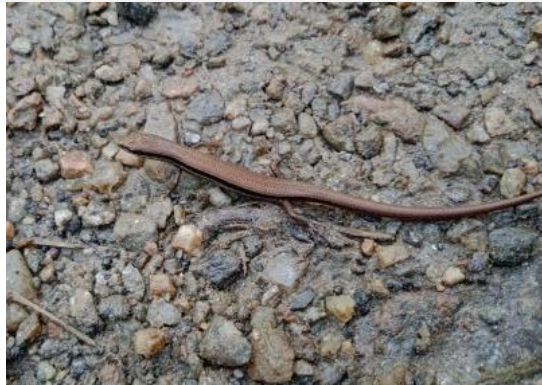

Photo 10: *Asymblepharus ladacensis*

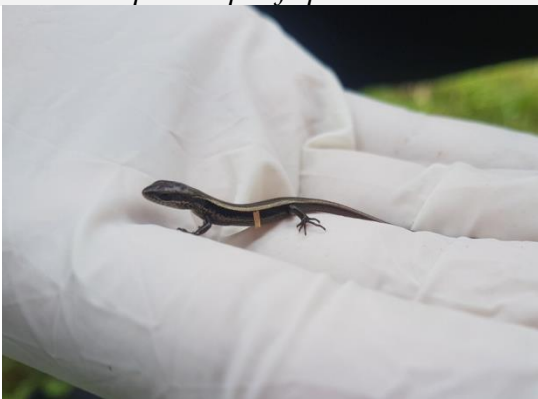

Photo 11: *A. himalayanus*
